# 1 Cryo-EM structures and binding of mouse ACE2 to SARS-CoV-2 variants of concern

2 Dongchun Ni<sup>1</sup>, Priscilla Turelli<sup>2</sup>, Bertrand Beckert<sup>3</sup>, Sergey Nazarov<sup>3</sup>, Emiko Uchikawa<sup>3</sup>,  
3 Alexander Myasnikov<sup>3</sup>, Florence Pojer<sup>4</sup>, Didier Trono<sup>2</sup>, Henning Stahlberg<sup>1,§</sup>, Kelvin Lau<sup>4,§</sup>

4 <sup>1</sup>Laboratory of Biological Electron Microscopy (LBEM), Institute of Physics, School of  
5 Basic 15 Science, École Polytechnique Fédérale de Lausanne (EPFL), and Dep. of Fund.  
6 Microbiology, Faculty of Biology and Medicine, University of Lausanne, Lausanne,  
7 Switzerland

8 <sup>2</sup>Laboratory of Virology and Genetics (LVG), School of Life Sciences, École polytechnique  
9 fédérale de Lausanne (EPFL), Lausanne, Switzerland

10 <sup>3</sup>Dubochet Center for Imaging (DCI), École polytechnique fédérale de Lausanne (EPFL) and  
11 University of Lausanne, Lausanne, Switzerland

12 <sup>4</sup>Protein Production and Structure Characterization Core Facility (PTPSP), School of  
13 Life Sciences, École polytechnique fédérale de Lausanne (EPFL), Lausanne, Switzerland

14 <sup>§</sup> Corresponding authors: [henning.stahlberg@epfl.ch](mailto:henning.stahlberg@epfl.ch), [kelvin.lau@epfl.ch](mailto:kelvin.lau@epfl.ch)

15

## 16 **ABSTRACT**

17 Investigation of potential hosts of the severe acute respiratory syndrome coronavirus-2  
18 (SARS-CoV-2) is crucial to understanding future risks of spillover and spillback. SARS-  
19 CoV-2 has been reported to be transmitted from humans to various animals after requiring  
20 relatively few mutations.<sup>1</sup> Mice are well adapted to human environments, frequently come in  
21 contact with humans, are used widely as infection models, and may act as reservoirs for  
22 SARS-CoV-2.<sup>2</sup> Structural and binding data of the mouse ACE2 receptor with the Spike  
23 protein of newly identified SARS-CoV-2 variants are needed to better understand the impact  
24 of variants of concern (VOC). Previous studies have developed mouse-adapted variants and  
25 have identified some determinants of binding.<sup>3,4</sup> Here we report the cryo-EM structures of  
26 mouse ACE2 bound to Spike ectodomains of four different VOC: Beta, Omicron BA.1,  
27 Omicron BA.2.12.1 and Omicron BA.4/5. These variants represent the oldest to the newest  
28 variants that are able to bind the mouse ACE2 receptor. Our high-resolution structural data

29 complemented with bio-layer interferometry (BLI) binding assays reveal a requirement for a  
30 combination of mutations in the Spike protein to enable the binding to mouse ACE2.

31

32 We performed BLI binding assays between SARS-CoV2 variants of concern to characterize  
33 the binding affinities of dimeric mouse ACE2 (mACE2) compared to that of the human  
34 receptor (hACE2). The wild-type Spike protein bound robustly hACE2 but not strongly to  
35 mACE2, with only appreciable signal at the highest concentration of 300 nM (Supplementary  
36 information, Fig. S1). With the emergence of the first generation of SARS-CoV2 variants,  
37 Alpha, Beta and Gamma, all sharing the N501Y mutation in their Spike protein  
38 (Supplementary information, Fig. S2), it was reported that mice were susceptible to  
39 infection.<sup>5-7</sup> We observed an increase in affinity to the mACE2 where we could detect  
40 appreciable binding with dissociation constants ( $K_d$ ) measuring below 100 nM as compared  
41 to wild-type (Fig. 1a, Supplementary information, Fig. S1). mACE2 increased its affinity for  
42 Spike further with the appearance with Omicron BA.1 and BA.2 with up to 10-fold increase  
43 compared to wild-type (Fig. 1a, Supplementary information, Fig. S1). The Spike protein from  
44 more recent Omicron BA.2.12.1 and BA.4/5 variants, containing additional mutations, still  
45 bound strongly to the receptor binding domain (RBD) interface (Fig. 1a, Supplementary  
46 information, Fig. S2). To probe how variants of concern gained high affinity mACE2  
47 binding, utilizing cryo-EM, we determined the structures of four mACE2/Spike VOC  
48 complexes spanning the variants Beta, Omicron BA.1, BA.2.12.1, and BA.4/5, at resolutions  
49 of 3.9 Å, 2.7Å, 2.9 Å and 2.9Å, respectively (Fig. 1b and Supplementary information, Figs.  
50 S3-S7). We also solved the hACE2/BA.4/5 Spike complex at 2.8Å for comparison  
51 (Supplementary information, Fig. S7). All of the structures show that mACE2/hACE2 bind  
52 the RBD of the Spike protein in the same manner at the binding ridge of a RBD in the up-  
53 position. During cryo-EM data-processing we observed the RBD of all Spikes in either a 2-up  
54 or 3-up conformation, with each up-RBD having an ACE2 bound (Supplementary  
55 information, Figs. S3-S7). To gain structural information at side-chain level resolution of the  
56 binding interface, we performed image processing of the cryo-EM data by location-focused  
57 refinement. This yielded maps at higher quality for each variant's ACE2/RBD interface,  
58 allowing to better understand the effects of mutations in these regions (Fig. 1c,  
59 Supplementary information, Figs. S3-S8).

60

61 SARS-CoV2 variants Alpha, Beta and Gamma the first reported to be able to engage  
62 mACE2, and all share a crucial N501Y mutation in their Spike proteins. In the mACE2/Beta

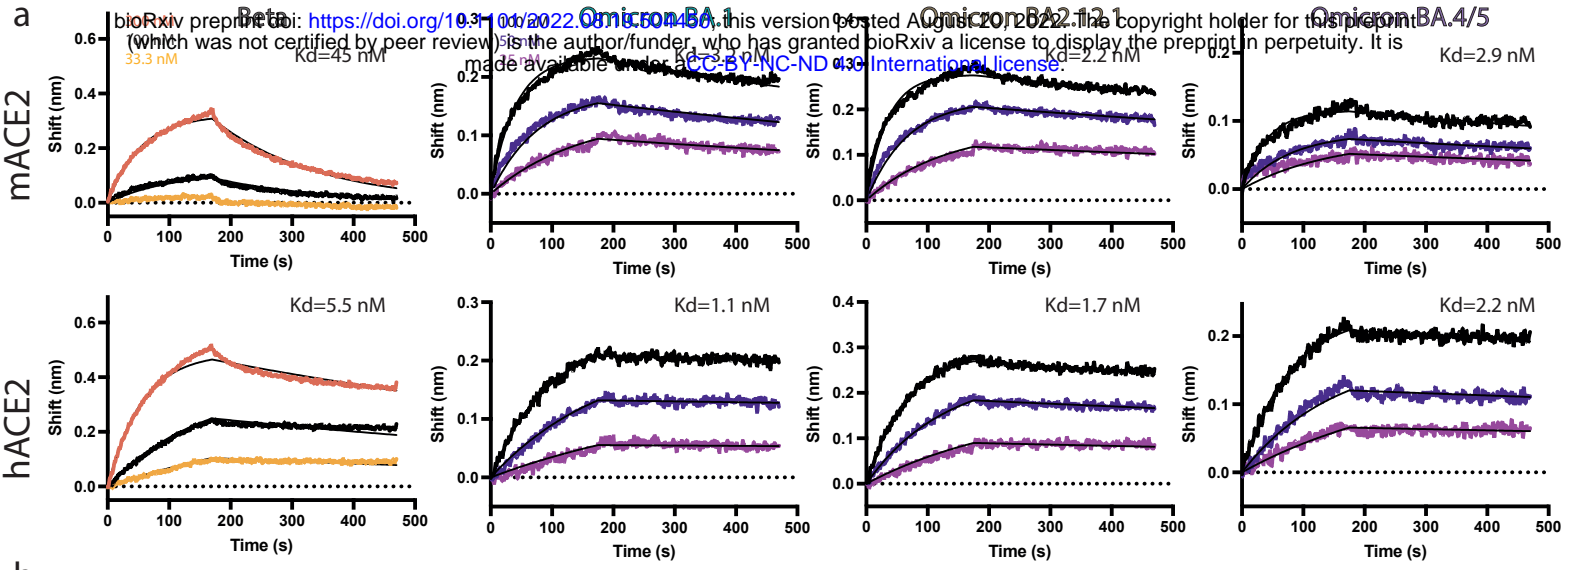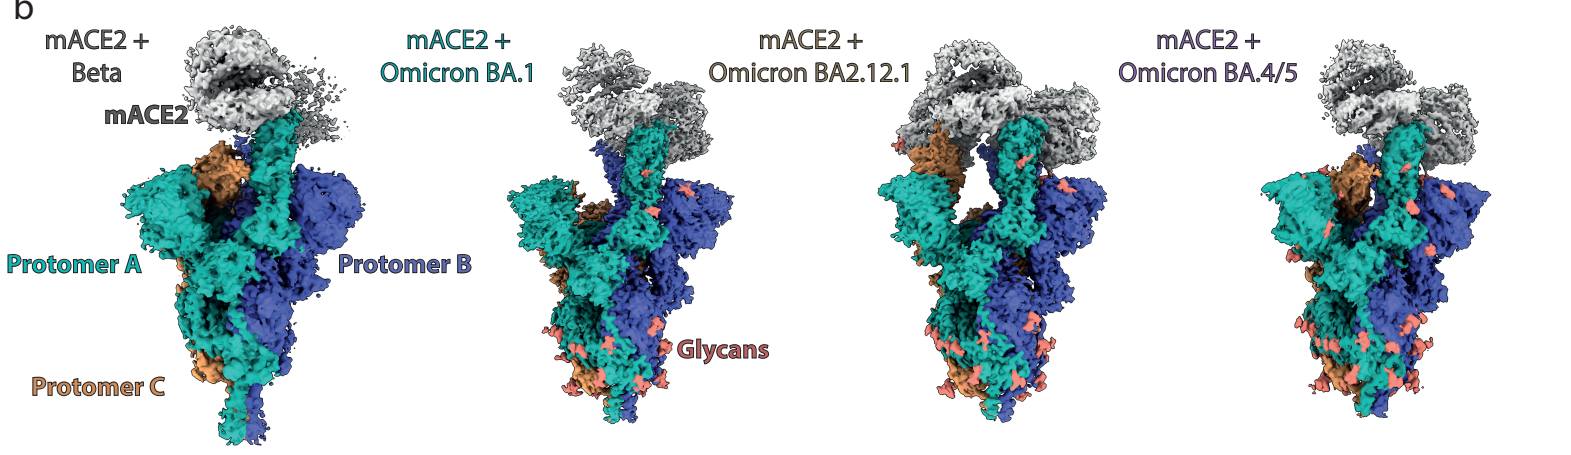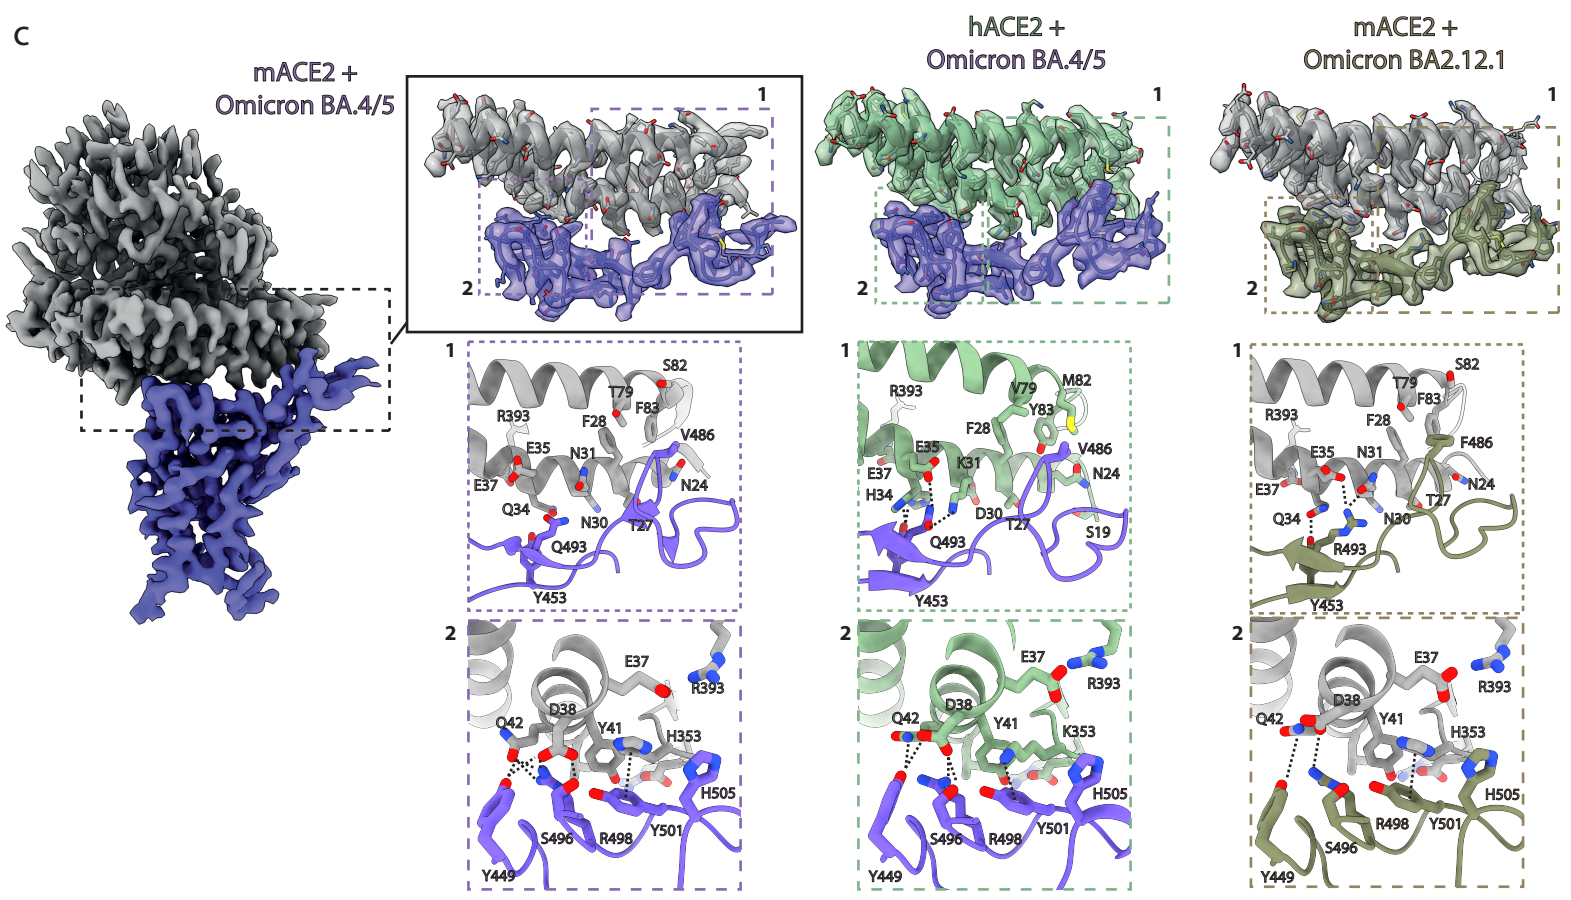

**d**

|         | 19 | 24 | 27,28 | 30,31 | 34,35 | 37,38 | 41,42,45 | 49 | 81,83 | 330 | 353 | 355 | 357 | 393 |
|---------|----|----|-------|-------|-------|-------|----------|----|-------|-----|-----|-----|-----|-----|
| human   | S  | Q  | TF    | DK    | HE    | ED    | YQ       | L  | L     | MY  | N   | K   | D   | R   |
| mouse   | S  | N  | TF    | NN    | QE    | ED    | YQ       | L  | T     | SF  | N   | H   | D   | R   |
| hamster | S  | Q  | TF    | DK    | QE    | ED    | YQ       | L  | L     | NY  | N   | K   | D   | R   |
| cat     | S  | L  | TF    | EK    | HE    | EE    | YQ       | L  | L     | TY  | N   | K   | D   | R   |
| dog     | -  | L  | TF    | EK    | YE    | EE    | YQ       | L  | L     | TY  | N   | K   | D   | R   |
| mink    | S  | L  | TF    | EK    | YE    | EE    | YQ       | L  | H     | TY  | N   | K   | D   | R   |

**Figure 1**

63 structure, we observe that the Spike N501Y mutation, which replaces a polar asparagine (N)  
64 residue with a polar and aromatic tyrosine (Y) residue, allows for  $\pi$ - $\pi$  interactions with Y43  
65 of mACE2, and potentially enables a new cation- $\pi$  and hydrogen bond interaction with the  
66 histidine H353, which is unique to the mouse mACE2 (Supplementary information, Fig. S9).  
67 This crucial Spike Y501 is also present in all later identified Omicron Spike variants. Beta  
68 and Gamma also share E484K and K417N/T as signature mutations in the Spike's RBD  
69 (Supplementary information, Fig S2). These two residues are unfortunately not resolved in  
70 our cryo-EM maps. However, *in vitro* BLI experiments showed that alongside N501Y, the  
71 E484K mutation can confer high-affinity binding of the Spike to mACE2 (Supplementary  
72 information, Fig. S1). We could not observe any binding of single mutants of N501Y, E484K  
73 or K417N of the Spike protein to mACE2. Only the combined presence of Y501 and K484 in  
74 the Spike protein showed binding to mACE2 at the concentration of Spike protein tested here  
75 (75 nM).

76

77 We next investigated Omicron variants BA.1, BA.2, BA.2.12.1 and BA.4/5 that most recently  
78 caused new waves of infections in several countries during the year 2022.<sup>8,9</sup> These variants  
79 contain up to 34 mutations scattered across the entire Spike protein, with the majority  
80 concentrated on the RBD, including N501Y and E484A (Supplementary information, Fig.  
81 S2). The accumulation of these mutations prompted an ongoing discussion about a possible  
82 murine origin of the Omicron variant.<sup>10</sup> Indeed, our here presented mACE2/BA.1 structure  
83 reveals multiple new interactions localized in two different patches. In patch 1, the longer  
84 arginine (R) sidechain of the BA.1 RBD Q493R mutation allows for hydrogen bonding with  
85 mACE2 residues N31 and Q34, which was not possible with the shorter glutamine (Q)  
86 residue present in the original Spike protein (Supplementary information, Fig. S9). In patch 2,  
87 Y501 is observed to form cation- $\pi$  interactions with H353 from mACE2, and new BA.1  
88 mutations G496S and Q498R form a new set of hydrogen-bonds and electrostatic interactions  
89 with mACE2's aspartic acid D38 (Supplementary information, Fig. S9). Overall, Omicron  
90 BA.1 mutations Q493R and Q498R are crucial for stronger binding to mACE2, alongside  
91 with the N501Y and E484A/K mutations present in preceding variants. These new  
92 interactions greatly increase the binding between mACE2 and Omicron Spike proteins with  
93 measured affinities by BLI up to 14-20-fold stronger compared to Beta (Fig. 1 and  
94 Supplementary information, Fig. S1).

95

96 Both the BA.2.12.1 and BA.4/5 Omicron subvariants carry the immune-evading L452R  
97 mutation first seen in the Delta variant. The site of mutation is not within the RBD-ACE2  
98 binding interface and, as expected, the binding affinities for both hACE2 and mACE2  
99 binding to BA.2.12.1 are unchanged compared to BA.2 (Fig. 1a, Supplementary information,  
100 Fig. S1). In the mACE2/BA.2.12.1 structure, the critical interactions made by Spike residues  
101 R498 and Y501 with mACE2 within patch 2 are conserved as in BA.1 (Fig. 1c).  
102 Interestingly, R493 of BA.2.12.1 has an alternative hydrogen bonding network with N31 and  
103 E35, instead of Q34, which now forms a hydrogen bond with Y453 of mACE2 suggesting a  
104 plasticity in its interactions (Fig. 1c).

105

106 The Omicron subvariants BA.4 and BA.5 that were the principal variants during an infection  
107 wave in the summer of 2022, share the L452R mutation. In addition, BA.4 and BA.5 contain  
108 the F486V mutation, and the reversion of R493 back to the wild-type Q493 (Supplementary  
109 information, Fig. S2). The structure the mACE2/BA.4/5 complex show crucial changes at  
110 patch 1, where the BA.4/5 mutation F486V loses Van der Waals interactions with adjacent  
111 mACE2 residues F83 and F28, and the wild-type Q493 (R493Q wild-type reversion) on the  
112 Spike's RBD no longer forms interactions with mACE2 (Fig. 1c). The hACE2/BA.4/5  
113 structures reveal the same loss of interactions for the Spike's F486V mutation, but the  
114 Spike's Q498 once again allows for an interaction to be formed with hACE2's K31, which  
115 was not possible with the Spike's R498 due to its charge repulsion from hACE's K31 (Fig.  
116 1c). The two mutations together allow for BA.4/5 Spike to maintain high affinity interactions  
117 with both, hACE2 and mACE2. This is an example of the interplay between balancing  
118 immune evasion, while maintaining high-affinity receptor binding. The other principal  
119 interactions between mACE2 and Spike's BA.4/5 in patch 2 are comparable to those  
120 observed between mACE2 and variants BA.1 or BA2.12.1.

121

122 In summary, our structural data and binding analysis of mACE2 to SARS-CoV-2 variants of  
123 concern highlight the evolutionary adaptations that have allowed the virus to evade the  
124 human immune system, and how those mutations impacted receptor binding in mice. Our  
125 results identified critical mutations of SARS-CoV-2's Spike protein, N501Y, E484K, Q493R  
126 and Q498R, that are required for high-affinity binding to mACE2, contributing a structural  
127 basis for our understanding of the potential of spillback of SARS-CoV-2 into the animal  
128 kingdom.

129

## 130 **FIGURE LEGENDS**

131 **Fig. 1:** Structural basis for mACE2 binding to Omicron variants of concern. **a** BLI binding  
132 assays of captured dimeric mouse or human ACE2 versus various concentrations of Spike  
133 variants of concern. Data curves are colored by concentration and the black line indicates the  
134 1:1 fit of the data. **b** Cryo-EM densities of the full mACE2/Spike variant of concern  
135 complexes. Each protomer of the Spike trimer is colored separately with mACE2 colored in  
136 grey. **c** Focused refinement of the RBD-ACE2 interface of the mACE2 BA.4/5 complex  
137 showing the cryo-EM density. Inset shows the zoomed view of the binding interface. The  
138 same view is shown for the hACE2/BA.4/5 and mACE2/BA2.12.1 complexes. **d** Zoomed  
139 views of specific interaction sites of patch 1 and patch 2 as indicated in (c). **e** Sequence  
140 alignment of human ACE2 with mouse ACE2 and other selected species. Red boxes highlight  
141 critical differences between human and mouse ACE2 residues.

142

## 143 **DATA AVAILABILITY**

144 Cryo-EM maps for the Spike variants in complex with mouse ACE2 were deposited in the  
145 Electron Microscopy Data Bank (EMDB) under the access codes EMD-15541 (full map,  
146 Beta, two mACE2 bound), EMD-15589 (local map, mACE2/Beta), EMD- 15580 (full map,  
147 BA.1, two mACE2 bound), EMD-15581 (full map, BA.1, three mACE2 bound), EMD-15590  
148 (local map, mACE2/BA.1), EMD-15584 (full map, BA.2.12.1, two mACE2 bound), EMD-  
149 15585 (full map, BA2.12.1, three mACE2 bound), EMD-15591 (local map,  
150 mACE2/BA.2.12.1), EMD-15586 (full map, BA.4/5, two mACE2 bound) and EMD-15592  
151 (local map, mACE2/BA.4/5).

152

153 Maps for Spike the human ACE2/Omicron BA.4/5 complex were deposited in the EMDB  
154 under the access codes EMD-15587 (full map, BA.4/5, three hACE2 bound) and EMD-15588  
155 (local map, hACE2/BA.4/5).

156

157 Atomic models were deposited in Protein Data Bank (PDB) under the access codes of PDB-  
158 8AQS (hACE2-BA.4/5), PDB-8AQT (mACE2/Beta), PDB-8AQU (mACE2/BA.1), PDB-  
159 8AQV (mACE2/BA.2.12.1) and PDB-8AQW (mACE2/BA.4/5).

160

161 Raw electron microscopy image data were deposited at the Electron Microscopy Public  
162 Image Archive (EMPIAR) under access codes EMPIAR-XXXXXX (Beta, two mACE2  
163 bound), EMPIAR-XXXXXX (BA.1, two mACE2 bound), EMPIAR-XXXXXX (BA.1, three

164 mACE2 bound), EMPIAR-XXXXX (BA.2.12.1, two mACE2 bound), EMPIAR-XXXXX  
165 (BA2.12.1, three mACE2 bound), and EMPIAR-XXXXX (BA.4/5, two mACE2 bound).

166

## 167 **CONTRIBUTIONS**

168 D.N., K.L., P.T., F.P., D.T. designed the project. P.T. designed and cloned the Spike variants.  
169 K.L purified the Omicron Spike and ACE2 and performed BLI assays. B.B., S.N., E.U.,  
170 A.M., froze and screened cryo-EM grids, collected data, and performed on-the-fly  
171 processing. D.N. processed cryo-EM data and built models. D.N. and K.L. analyzed data and  
172 prepared figures. K.L., D.N., wrote the manuscript. F.P., H.S., and D.T. supervised the  
173 project.

174

## 175 **ACKNOWLEDGEMENTS**

176 Cryo-EM data collection and initial image processing was performed at the Dubochet Center  
177 for Imaging, a common initiative of the EPFL, UNIL and UNIGE, with data collection  
178 performed in both Geneva and Lausanne. We thank Yashar Sadian for data collection on the  
179 Talos Arctica. We thank Rosa Schier, Laurence Durrer, Soraya Quinche and Michael  
180 François of the Protein Production and Structure Core Facility of EPFL for helping in the  
181 production of Spike Omicron and ACE2. Charlene Raclot for cloning of the Spike variants.  
182 This work was supported in part by NCCR TransCure, a National Centre of Competence in  
183 Research, funded by the Swiss National Science Foundation (grant number 185544)

184

## 185 **REFERENCES**

- 186 1. Tan, C. C. S. *et al.* Transmission of SARS-CoV-2 from humans to animals and potential  
187 host adaptation. *Nat Commun* **13**, 2988 (2022).
- 188 2. Muñoz-Fontela, C. *et al.* Advances and gaps in SARS-CoV-2 infection models. *PLOS*  
189 *Pathogens* **18**, e1010161 (2022).
- 190 3. Sun, S. *et al.* Characterization and structural basis of a lethal mouse-adapted SARS-CoV-  
191 2. *Nat Commun* **12**, 5654 (2021).
- 192 4. Dinno, K. H. *et al.* A mouse-adapted model of SARS-CoV-2 to test COVID-19  
193 countermeasures. *Nature* **586**, 560–566 (2020).

- 194 5. Yao, W. *et al.* Circulating SARS-CoV-2 variants B.1.1.7, 501Y.V2, and P.1 have gained  
195 ability to utilize rat and mouse Ace2 and altered in vitro sensitivity to neutralizing  
196 antibodies and ACE2-Ig. *bioRxiv* 2021.01.27.428353 (2021)  
197 doi:10.1101/2021.01.27.428353.
- 198 6. Thakur, N. *et al.* SARS-CoV-2 variants of concern alpha, beta, gamma and delta have  
199 extended ACE2 receptor host ranges. *Journal of General Virology* **103**, 001735.
- 200 7. Montagutelli, X. *et al.* The B1.351 and P.1 variants extend SARS-CoV-2 host range to  
201 mice. <http://biorxiv.org/lookup/doi/10.1101/2021.03.18.436013> (2021)  
202 doi:10.1101/2021.03.18.436013.
- 203 8. Viana, R. *et al.* Rapid epidemic expansion of the SARS-CoV-2 Omicron variant in  
204 southern Africa. 2021.12.19.21268028  
205 <https://www.medrxiv.org/content/10.1101/2021.12.19.21268028v1> (2021)  
206 doi:10.1101/2021.12.19.21268028.
- 207 9. Tegally, H. *et al.* Emergence of SARS-CoV-2 Omicron lineages BA.4 and BA.5 in South  
208 Africa. *Nat Med* 1–6 (2022) doi:10.1038/s41591-022-01911-2.
- 209 10. Wei, C. *et al.* Evidence for a mouse origin of the SARS-CoV-2 Omicron variant. *Journal*  
210 *of Genetics and Genomics* (2021) doi:10.1016/j.jgg.2021.12.003.
- 211 11. Punjani, A., Rubinstein, J. L., Fleet, D. J. & Brubaker, M. A. cryoSPARC: algorithms for  
212 rapid unsupervised cryo-EM structure determination. *Nat Methods* **14**, 290–296 (2017).
- 213 12. Pettersen, E. F. *et al.* UCSF Chimera—A visualization system for exploratory research  
214 and analysis. *Journal of Computational Chemistry* **25**, 1605–1612 (2004).
- 215 13. Emsley, P., Lohkamp, B., Scott, W. G. & Cowtan, K. Features and development of Coot.  
216 *Acta Cryst D* **66**, 486–501 (2010).
- 217 14. Liebschner, D. *et al.* Macromolecular structure determination using X-rays, neutrons and  
218 electrons: recent developments in Phenix. *Acta Cryst D* **75**, 861–877 (2019).



219 15. Pettersen, E. F. *et al.* UCSF ChimeraX: Structure visualization for researchers, educators,  
220 and developers. *Protein Science* **30**, 70–82 (2021).

221

## 222 **Supplementary Information**

223

## 224 **METHODS AND MATERIALS**

### 225 **Protein Production and Purification**

226 The Spike trimer was designed to mimic the native trimeric conformation of the protein in vivo  
227 and the expression vector was kindly provided by Prof. Jason McLellan, University of Texas,  
228 Austin (TX), USA. It encoded the prefusion ectodomain of the original 2019-CoV Spike,  
229 containing a native signal peptide, residues 986 and 987 mutated to proline (2P), a mutated  
230 putative furin cleavage site (residues 682-685 mutated to GSAS), a C-terminal T4 foldon fusion  
231 domain to stabilize the trimer complex, followed by C-terminal 8x His and 2x Strep tags for  
232 affinity purification. The trimeric Spike protein was transiently expressed in suspension-  
233 adapted ExpiCHO cells (Thermo Fisher) in ProCHO5 medium (Lonza) at  $5 \times 10^6$  cells/mL  
234 using PEI MAX (Polysciences) for DNA delivery. At 1 h post-transfection, dimethyl sulfoxide  
235 (DMSO; AppliChem) was added to 2% (v/v). Following a 7-day incubation with agitation at  
236 31 °C and 4.5% CO<sub>2</sub>, the cell culture medium was harvested and clarified using a 0.22 µm  
237 filter. The conditioned medium was loaded onto Streptactin XT columns (IBA) washed with  
238 PBS and eluted with 50 mM biotin in 150 mM NaCl, 100 mM HEPES 7.5. Eluted protein was  
239 then dialyzed overnight into PBS. The purity of Spike trimers was determined to be >99% pure  
240 by SDS-PAGE analysis. Point mutations were generated by InFusion-mediated site directed  
241 mutagenesis. Variant clones were generated by gene synthesis (Twist Biosciences, Genscript  
242 and IDT) on the 2019-CoV Spike background as above. All mutants were produced and  
243 purified in an identical manner to the original 2019-Cov S protein.

244

### 245 **Cryo-electron microscopy**

#### 246 **mACE2/Beta complex**

247

248 Cryo-EM grids were prepared with a Leica EM GP2 (Leica) plunge-freezing device, using  
249 Quantifoil R2/1 copper 400 grids. 3.0 µL of a sample containing 0.4 µM Beta Spike and 0.7  
250 µM mACE2-Fc was applied to the glow-discharged grids, and backblotted for 2 s with a 10 s

251 wait time, 80% humidity and 10 °C in the sample chamber, and the blotted grids were  
252 plunge-frozen in liquid nitrogen-cooled liquid ethane.

253

254 Grids were screened for particle presence and ice quality on a TFS Talos Arctica transmission  
255 electron microscope (TEM) operated at 200kV. Cryo-EM data was collected using the same  
256 microscope, equipped with a TFS Falcon 3 camera. Movies were recorded at a nominal  
257 magnification of 150kx, corresponding to a 0.9759Å pixel, with defocus values ranging from  
258 -0.8 to -2.5 µm. Exposures were adjusted automatically to 40 e-/Å<sup>2</sup> total dose with automatic  
259 collection using EPU.

260

### 261 **mACE2/Omicron BA.1 complex**

262 Cryo-EM grids were prepared with a Vitrobot Mark IV (ThermoFisher Scientific (TFS)).  
263 Quantifoil R1.2/1.3 Au 400 holey carbon grids were glow-discharged for 120 s at 15mA  
264 using a PELCO easiGlow device (Ted Pella, Inc.). 3.0 µL of a sample containing 9 µM  
265 Omicron BA.1 and 16 µM mACE-Fc was applied to the glow-discharged grids, and blotted  
266 for 6 s under blot force 10 at 100% humidity and 4 °C in the sample chamber, and the blotted  
267 grids were plunge-frozen in liquid nitrogen-cooled liquid ethane.

268

269 Grids were screened for particle presence and ice quality on a TFS Glacios TEM (200kV),  
270 and the best grids were transferred to TFS Titan Krios G4 TEM. Cryo-EM data was collected  
271 using TFS Titan Krios G4, equipped with a Cold-FEG and Selectris X energy filter, on a  
272 Falcon IV detector in electron counting mode. Falcon IV gain references were collected just  
273 before data collection. Data was collected using TFS EPU v2.12.1 using aberration-free  
274 image shift protocol (AFIS). Movies were recorded at the nominal magnification of 165kx,  
275 corresponding to the 0.726Å pixel size at the specimen level, with defocus values ranging  
276 from -0.7 to -2.0 µm. Exposures were adjusted automatically to 60 e-/Å<sup>2</sup> total dose.

277

### 278 **hACE2/Omicron BA.4/5, mACE2/Omicron BA.4/5, mACE2/Omicron BA.2.12.1**

279

280 Cryo-EM grids were prepared with a Vitrobot Mark IV (ThermoFisher Scientific (TFS)).  
281 Quantifoil R1.2/1.3 Au 400 holey carbon grids were glow-discharged for 120 s at 15mA  
282 using a PELCO easiGlow device (Ted Pella, Inc.). 3.0 µL of a sample containing 14 µM of  
283 the corresponding Spike and 25 µM mACE-Fc was applied to the glow-discharged grids, and

284 blotted for 6 s under blot force 10 at 100% humidity and 4 °C in the sample chamber, and the  
285 blotted grid was plunge-frozen in liquid nitrogen-cooled liquid ethane.

286

287 Grids were screened for particle presence and ice quality on a TFS Glacios TEM (200kV),  
288 and the best grids were transferred to TFS Titan Krios G4 TEM. Cryo-EM data was collected  
289 using the TFS Titan Krios G4 TEM, equipped with a Cold-FEG, on a Falcon IV detector in  
290 electron counting mode. Falcon IV gain references were collected just before data collection.  
291 Data was collected using TFS EPU v2.12.1 using aberration-free image shift protocol (AFIS).  
292 Movies were recorded at nominal magnification of 165kx, corresponding to the 0.83Å pixel  
293 size at the specimen level, with defocus values ranging from -0.7 to -2.5 µm. Exposures were  
294 adjusted automatically to 60 e-/Å<sup>2</sup> total dose.

295

### 296 **Cryo-EM image processing**

297 On-the-fly processing was first performed during data acquisition for evaluating the data  
298 quality during screening by using cryoSPARC live v3.3.1.4.<sup>11</sup> The obtained ab-initio  
299 structures were used as templates for better particle picking. Motion correction was  
300 performed on raw stacks without binning, using the cryoSPARC implementation of motion  
301 correction. The full data processing workflow is shown in Supplementary information, Figs.  
302 S3-S8 and processing statistics on Table 1.

303

### 304 **Cryo-electron microscopy model building**

305 The models of a SARS-CoV2 Spike (PDB ID 7QO7), mouse ACE2 (PDB ID 7FDK) and  
306 human ACE2 (PDB ID 7FDG) were re-fit into the cryo-EM maps with UCSF Chimera.<sup>12</sup>  
307 These docked models were extended and rebuilt manually with refinement, using Coot and  
308 Phenix.<sup>13,14</sup> Figures were prepared in UCSF ChimeraX.<sup>15</sup>

309

### 310 **Biolayer Interferometry (BLI)**

311 All experiments were performed on a Gator BLI system. Running buffer was 150 mM NaCl,  
312 10 mM HEPES 7.5. For binding assays, dimeric Fc-ACE2 was diluted to 10 µg/mL and  
313 captured with MFc tips (GatorBio). Loaded tips were dipped into a 3 or 2-fold serial dilution  
314 series (300 nM, 100 nM, 33.3 nM, or 100 nM, 50 nM, 25 nM) of target analyte Spike protein.  
315 Screening of independent point mutations was done as above at a single concentration of 75  
316 nM. Curves were processed using the Gator software with a 1:1 fit after background  
317 subtraction. Plots were generated in Prism 9.

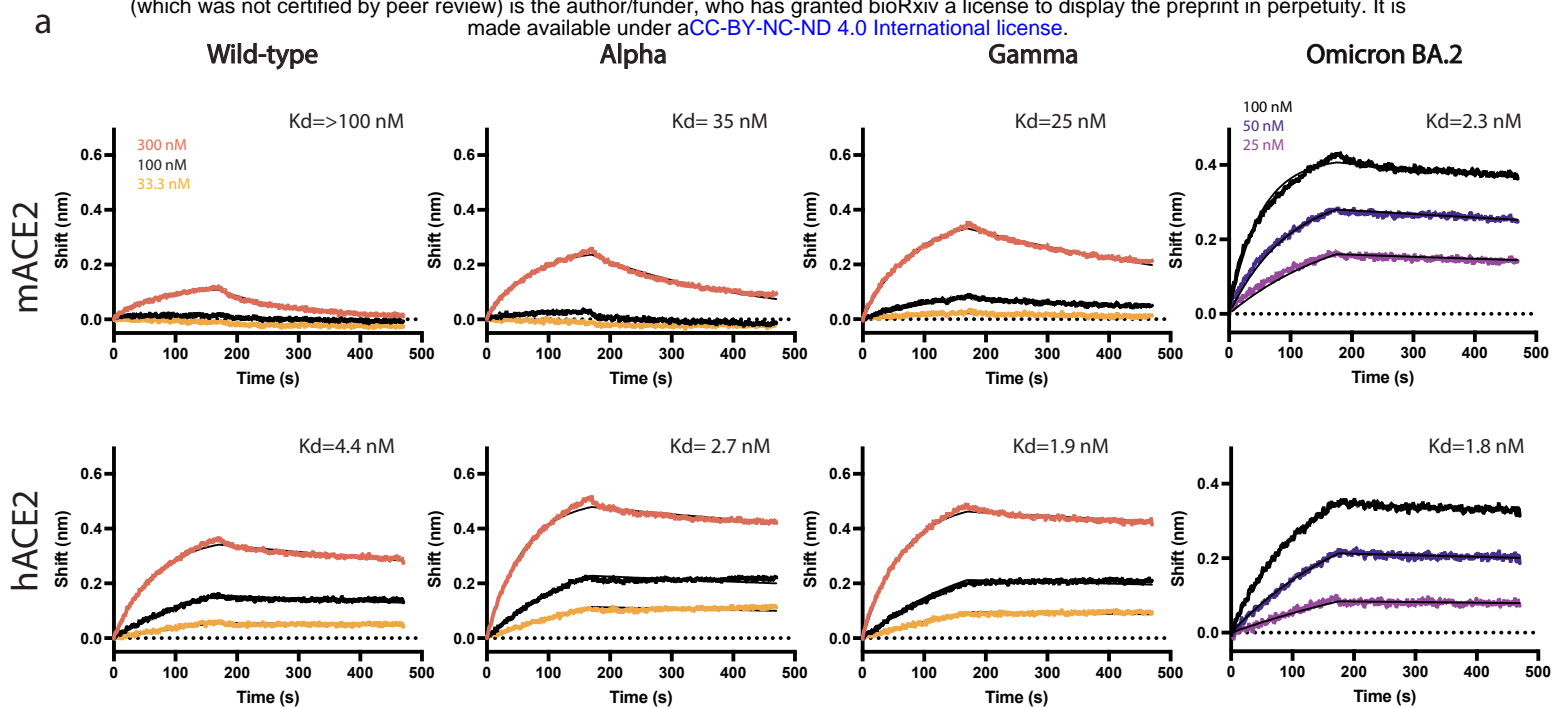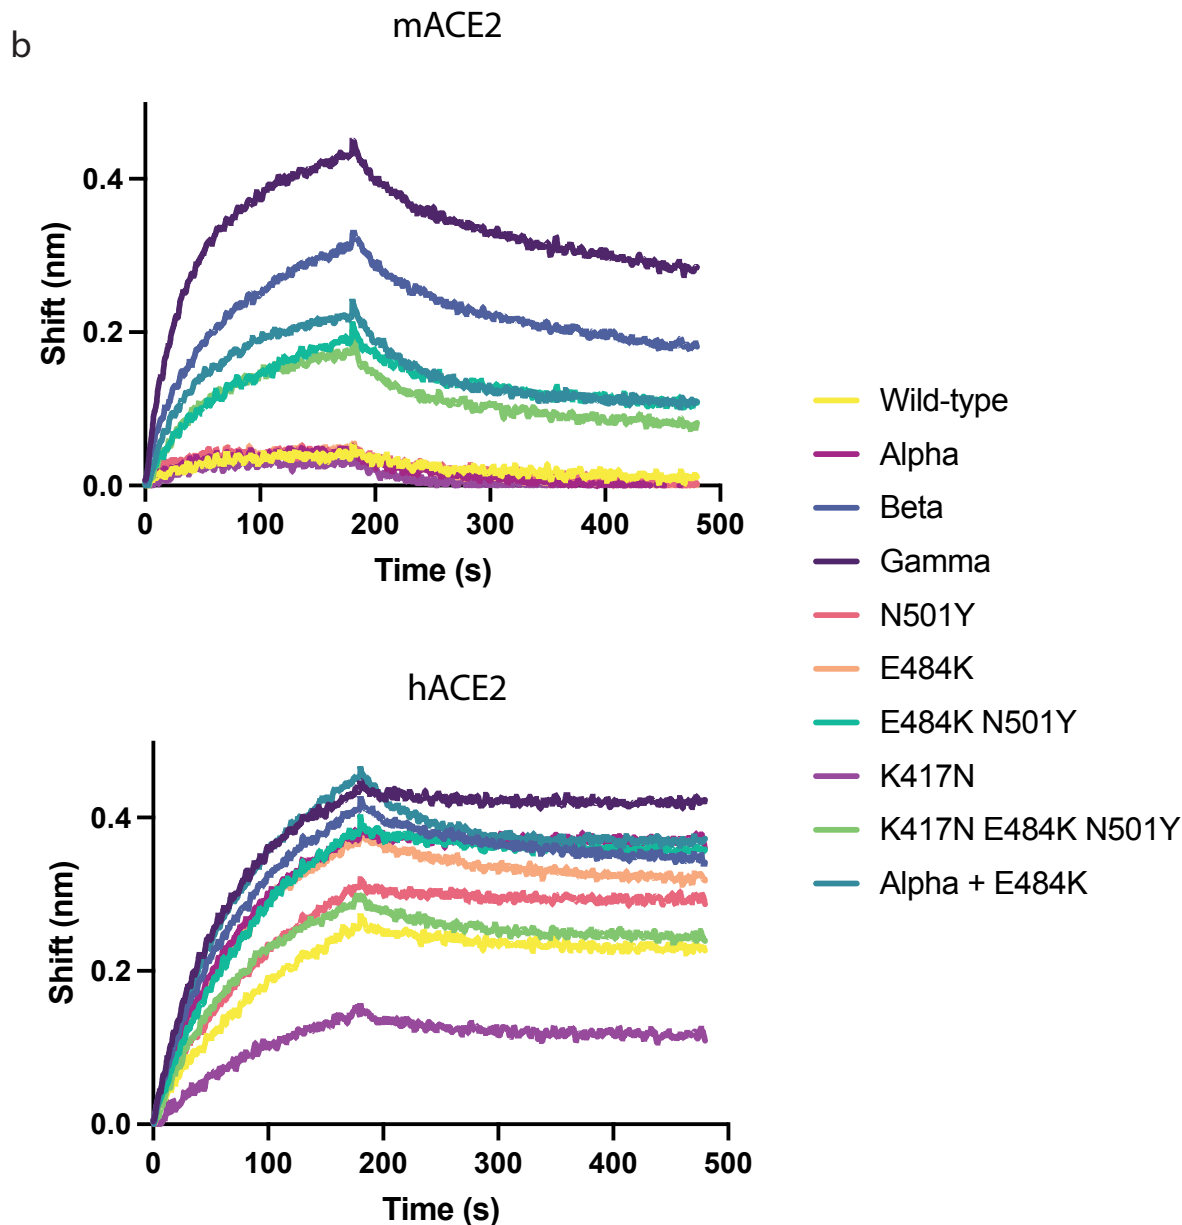

Figure S1

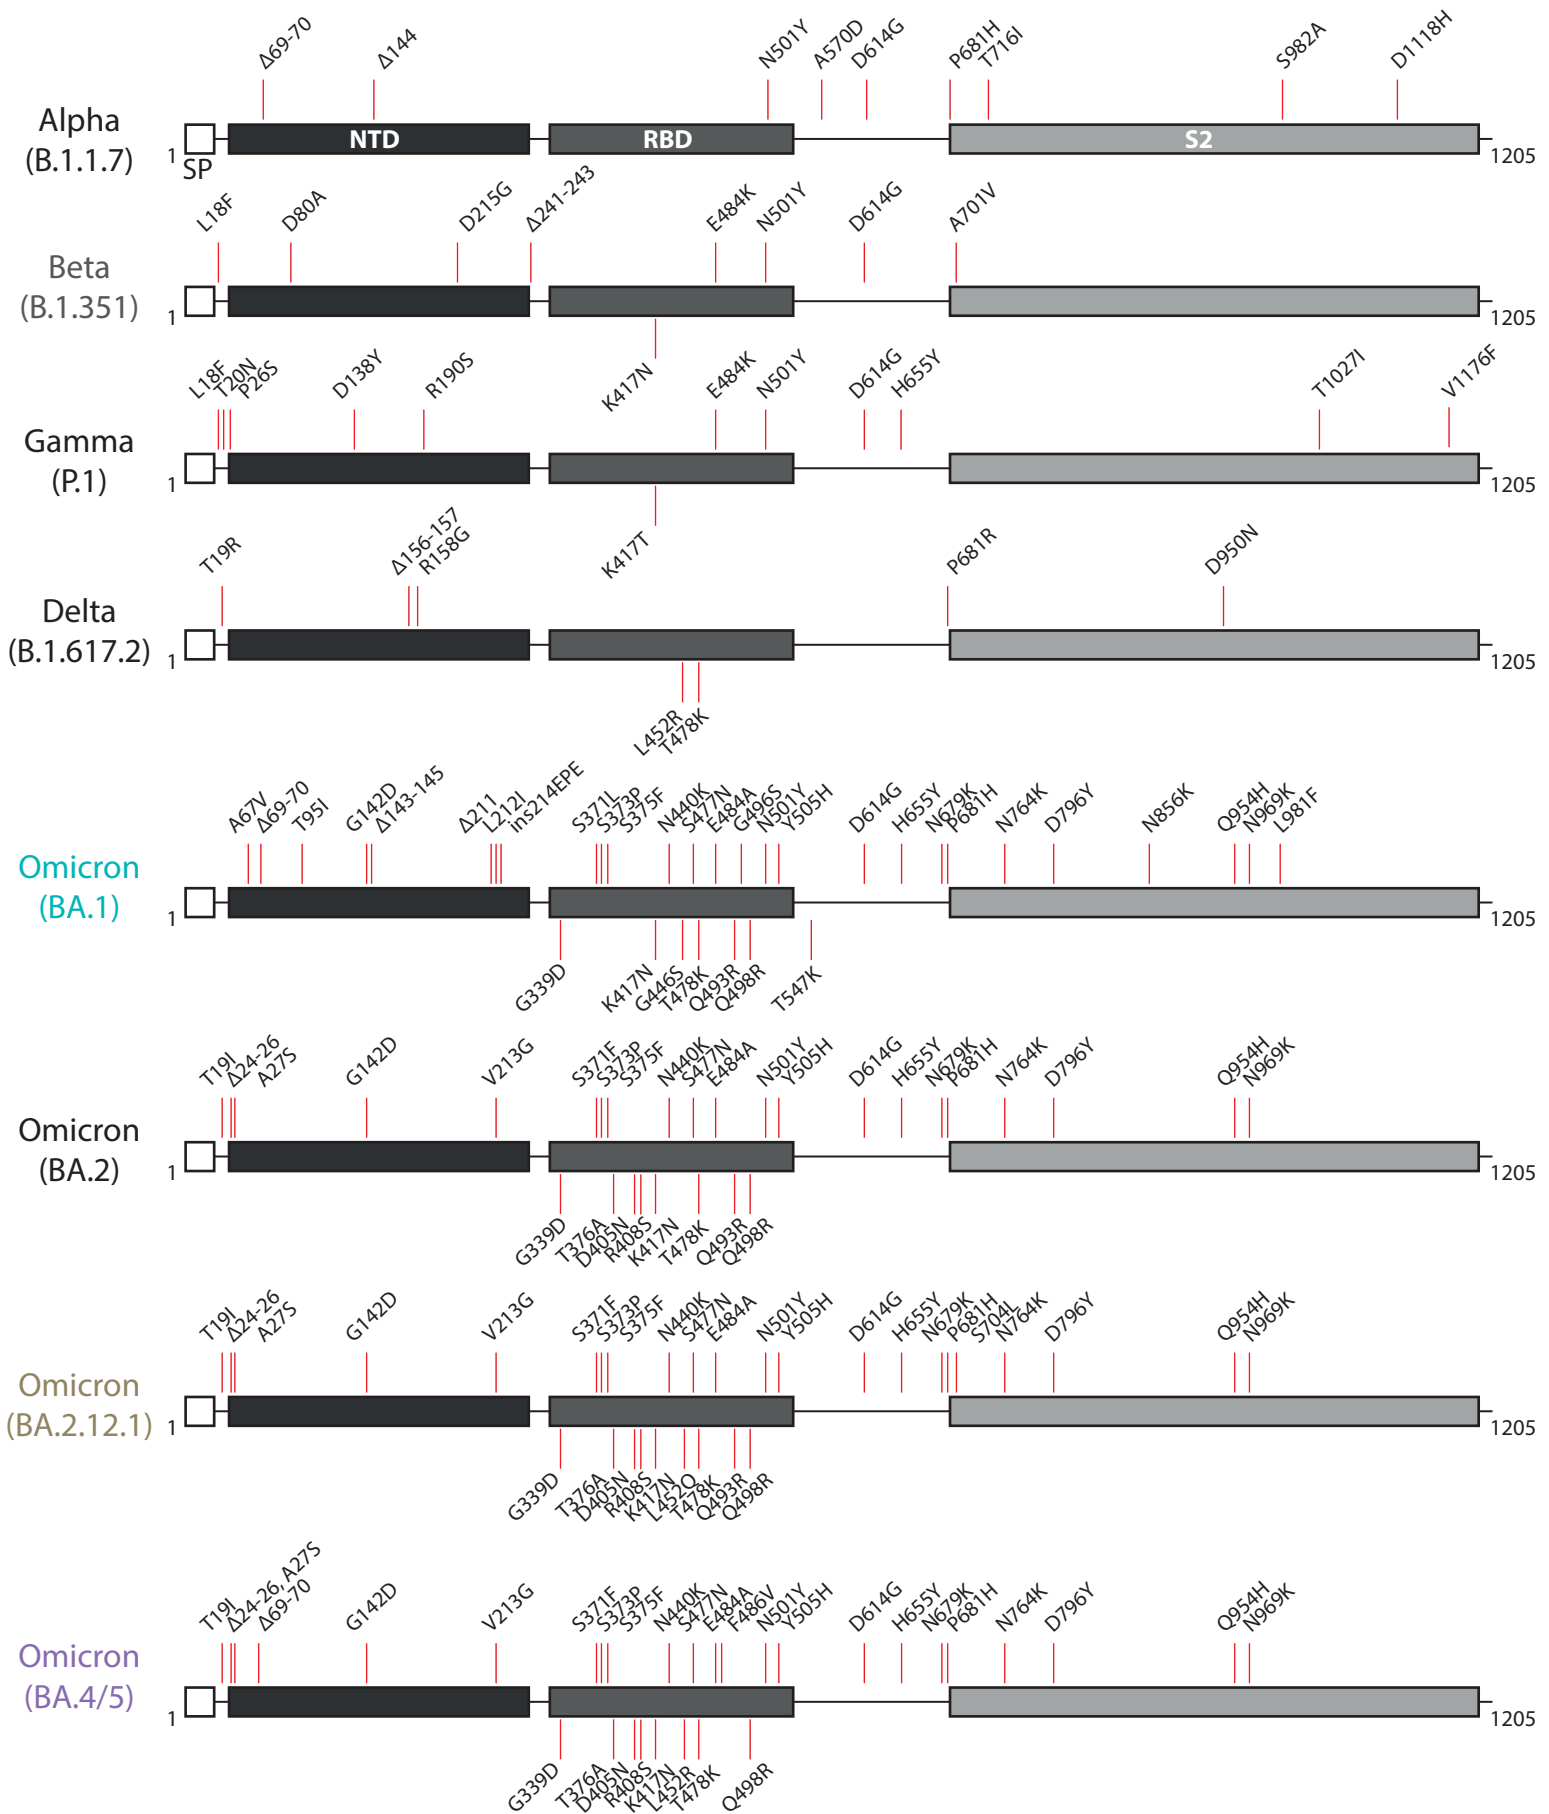

Figure S2

**mACE2 +  
Beta**

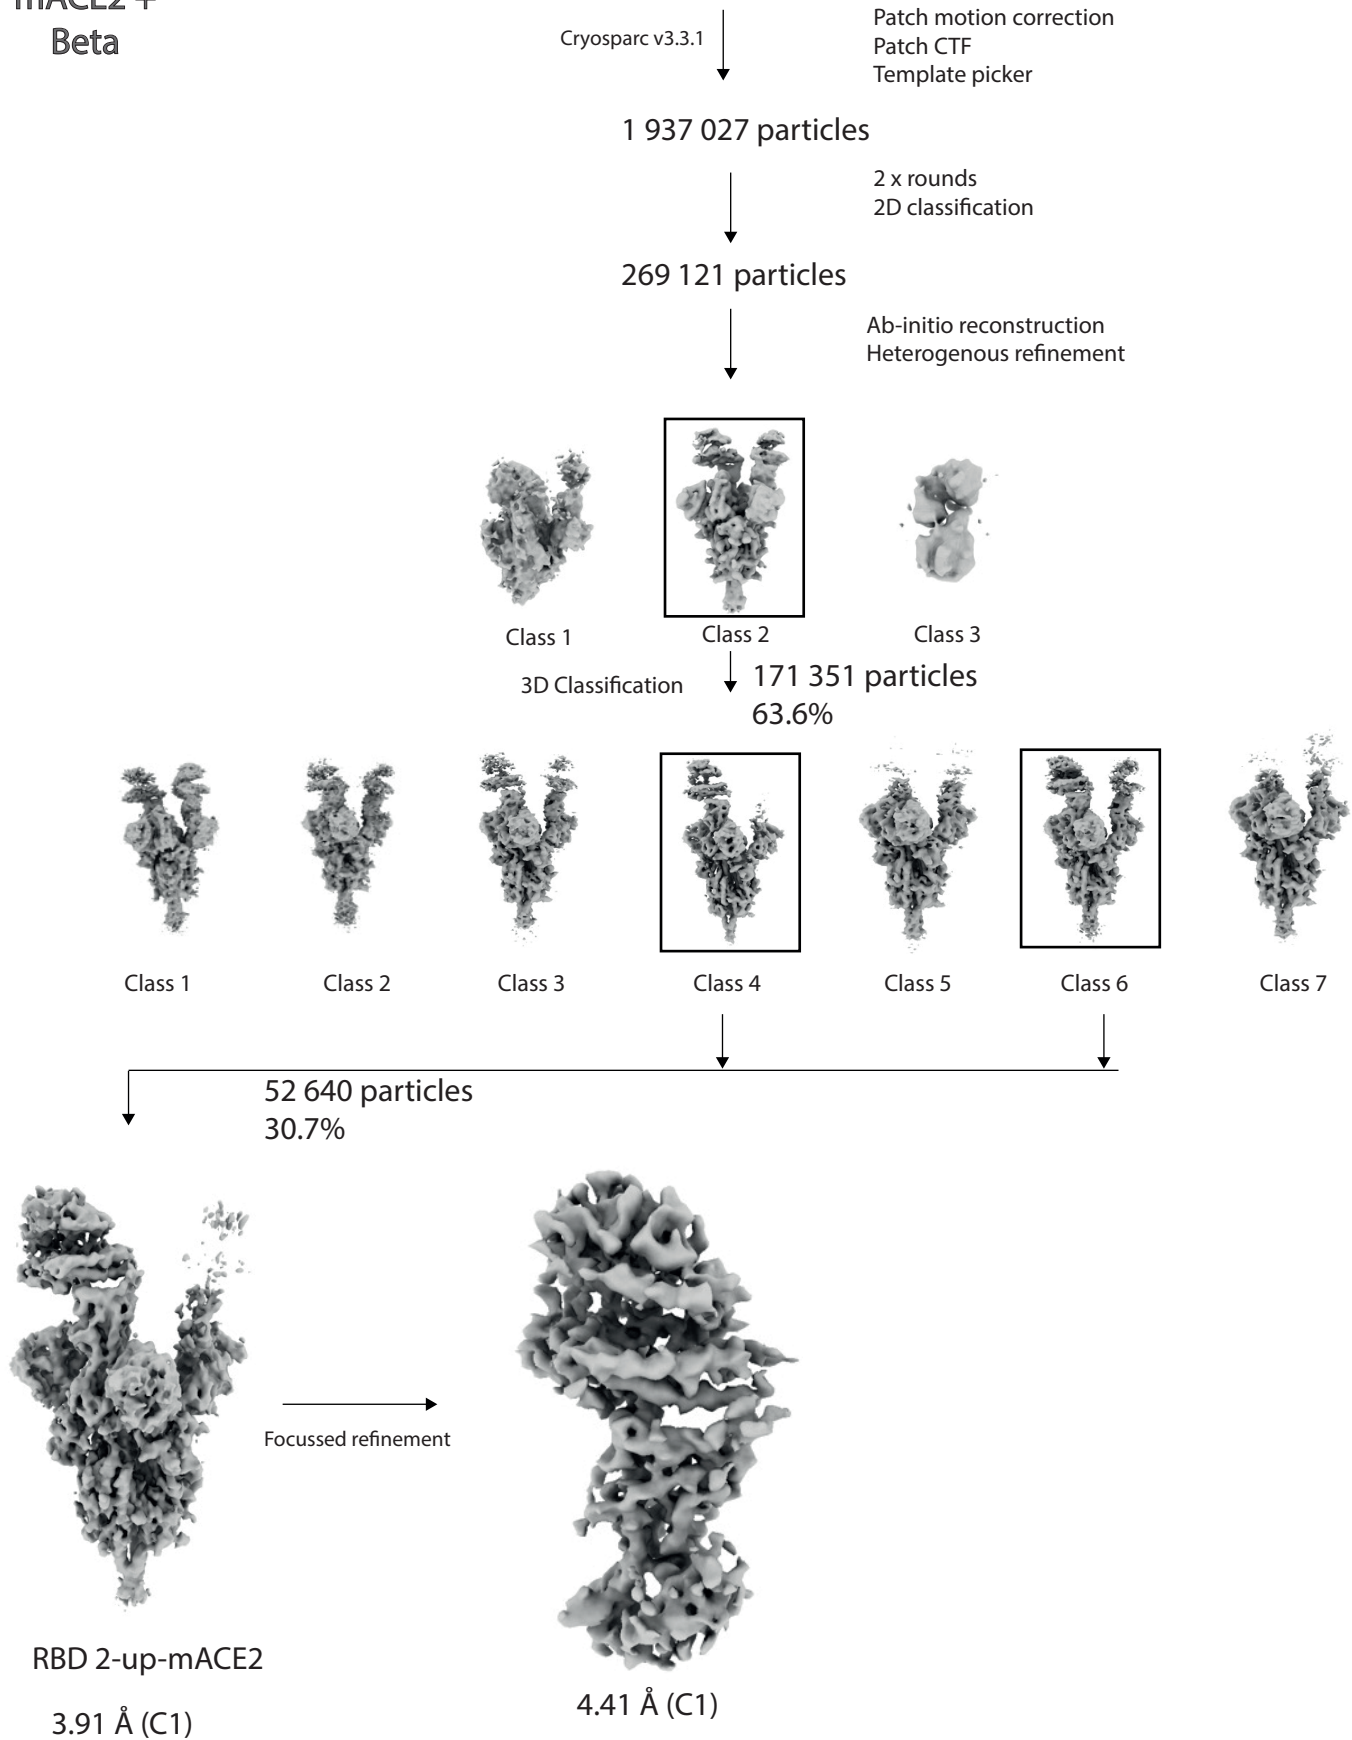

**Figure S3**

# mACE2 + Omicron BA.1

Cryosparc v3.3.1

Patch motion correction  
Patch CTF  
Template picker

2 465 003 particles

2 x rounds  
2D classification

1 144 959 particles

Ab-initio reconstruction  
Heterogenous refinement

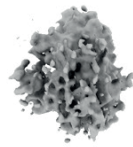

Class 1

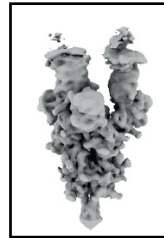

Class 2

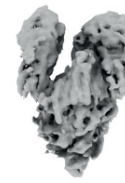

Class 3

635 138 particles  
Heterogenous refinement

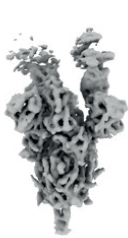

Class 1

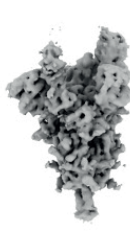

Class 2

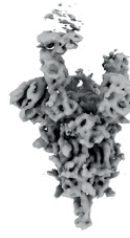

Class 3

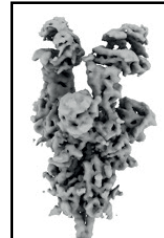

Class 4

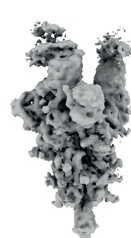

Class 5

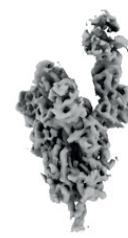

Class 6

119 912 particles  
Heterogenous refinement

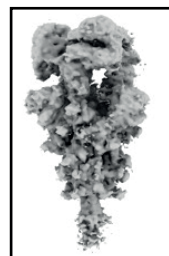

Class 1

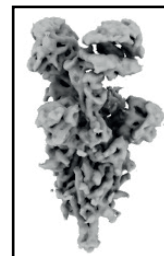

Class 2

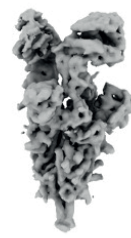

Class 3

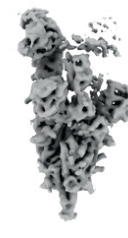

Class 4

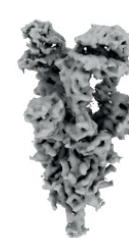

Class 5

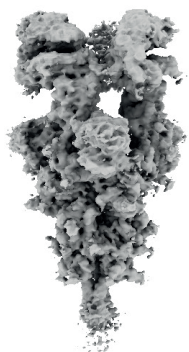

24 621 particles  
20.1%

RBD 3-up-mACE2  
3.03 Å (C1)

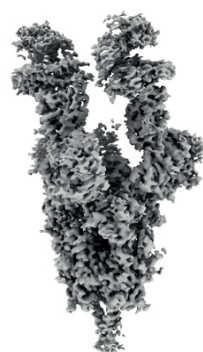

87 727 particles  
73.1%

RBD 2-up-mACE2  
2.66 Å (C1)

Focused refinement

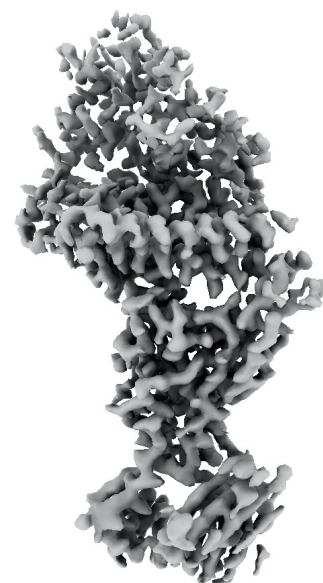

3.22 Å (C1)

Figure S4

# mACE2 + Omicron BA2.12.1

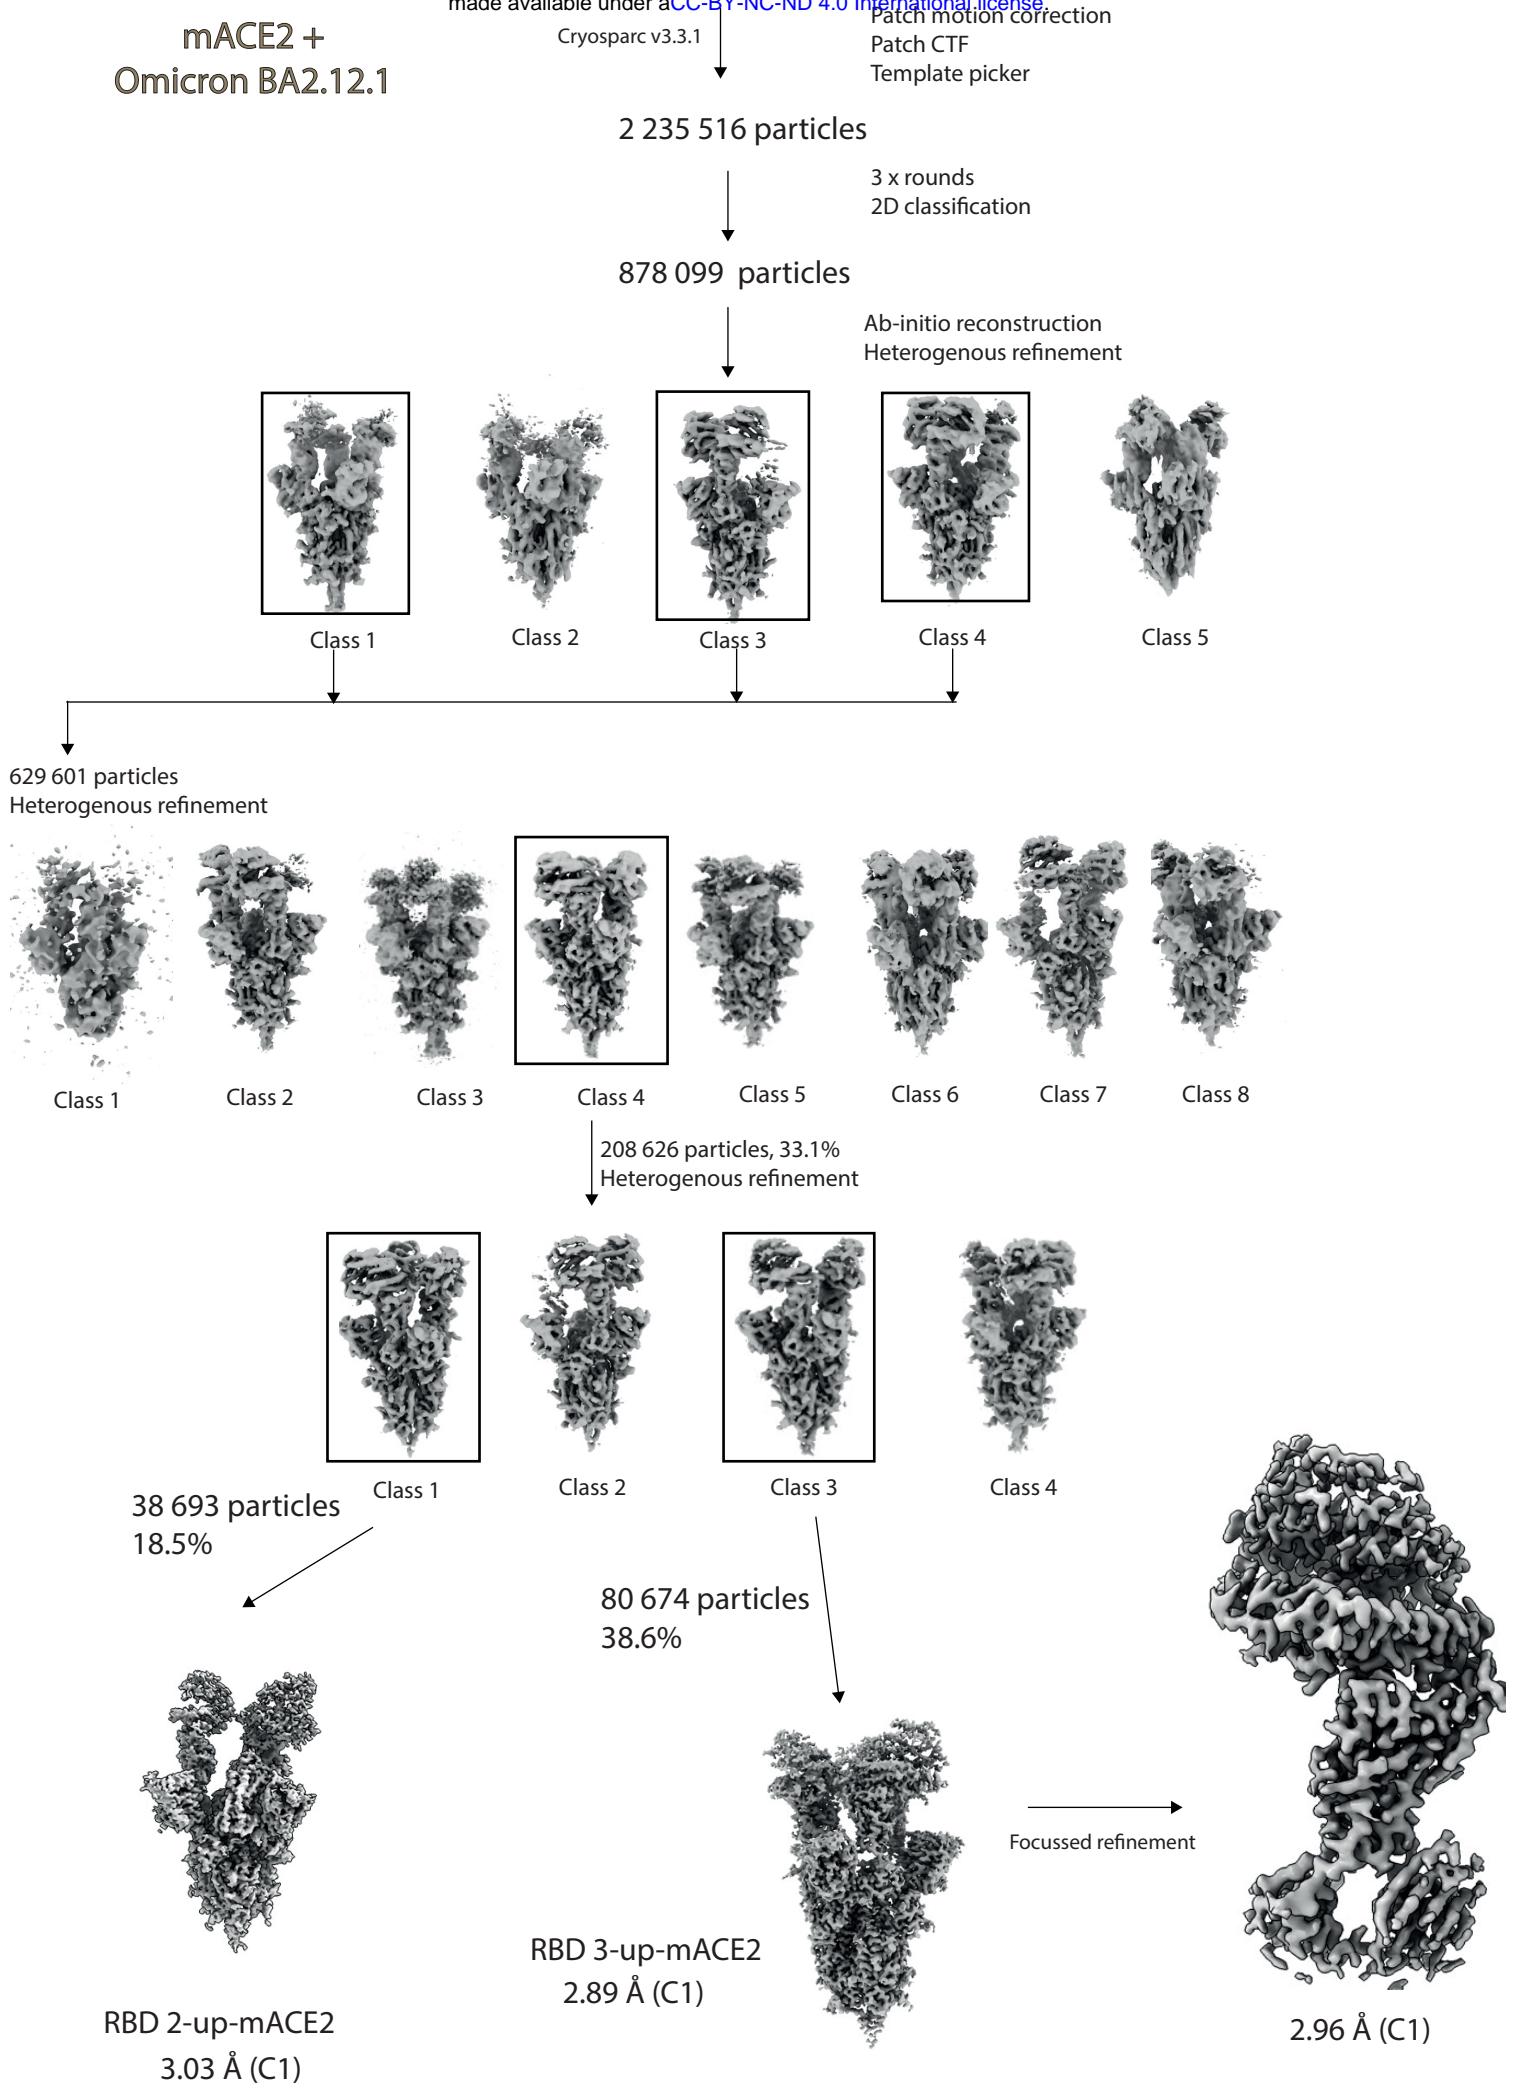

**Figure S5**



# mACE2 + Omicron BA.4/5

Cryosparc v3.3.1

Patch motion correction  
Patch CTF  
Template picker

2 033 320 particles

2 x rounds  
2D classification

640 785 particles

Ab-initio reconstruction  
Heterogenous refinement

RBD 3-up-mACE2

257 855 particles, 40.2%

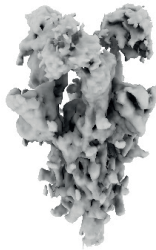

Class 1

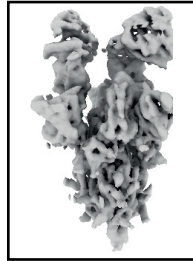

Class 2

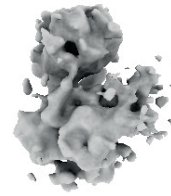

Class 3

349 815 particles, 54.6%  
Heterogenous refinement

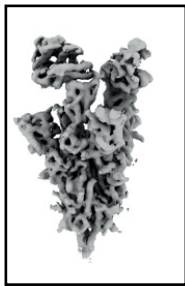

Class 1

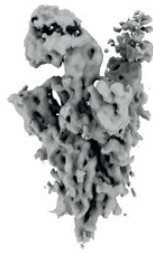

Class 2

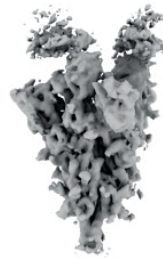

Class 3

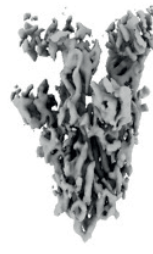

Class 4

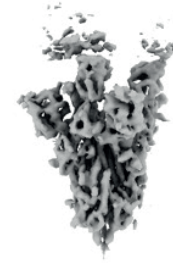

Class 5

103 496 particles  
29.6%

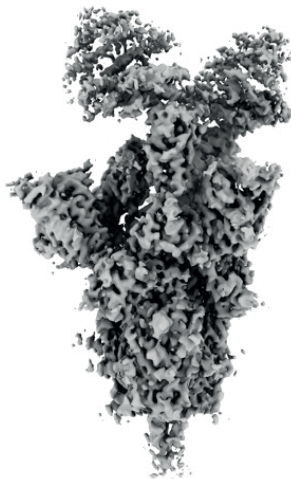

RBD 2-up-mACE2  
2.90 Å (C1)

Focussed refinement

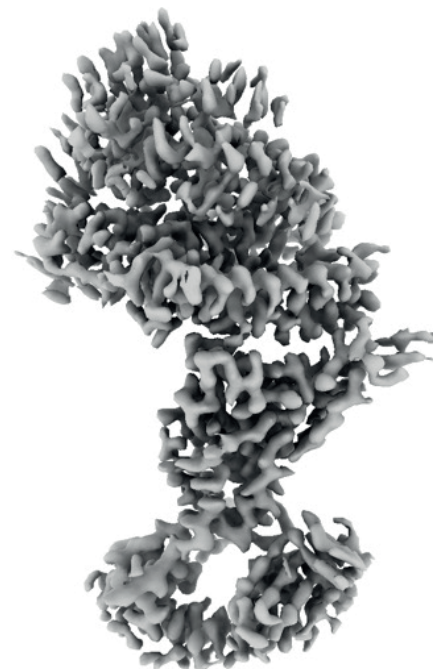

3.3 Å (C1)

Figure S6

# hACE2 + Omicron BA.4/5

Cryosparc v3.3.1

Patch CTF  
Template picker

2 493 631 particles

3 x rounds  
2D classification

837 875 particles

Ab-initio reconstruction  
Heterogenous refinement

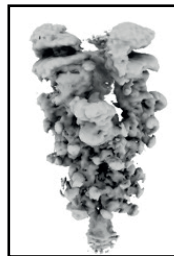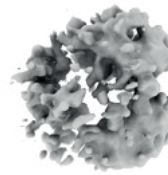

Class 1

Class 2

777 279 particles  
Heterogenous refinement

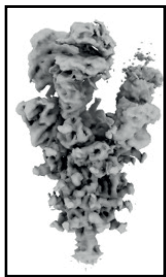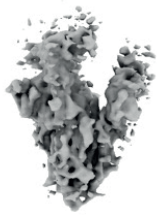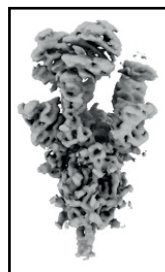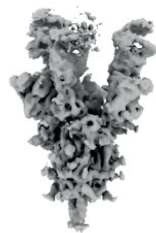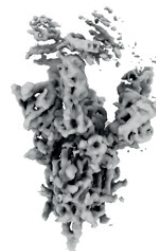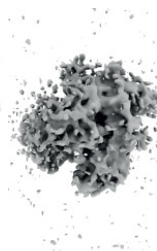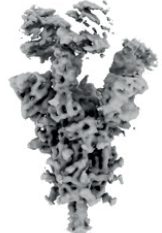

Class 1

Class 2

Class 3

Class 4

Class 5

Class 6

Class 7

359 486 particles  
Heterogenous refinement

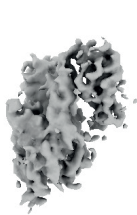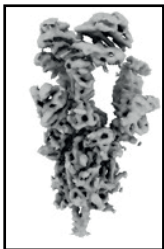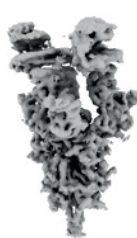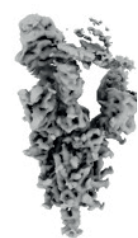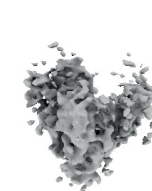

Class 1

Class 2

Class 3

Class 4

Class 5

94 718 particles

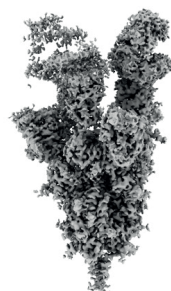

RBD 3-up-mACE2

2.79 Å (C1)

Focused refinement

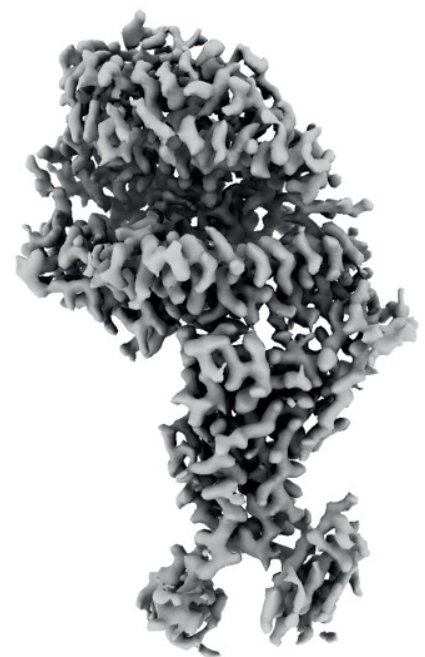

2.92 Å (C1)

**Figure S7**

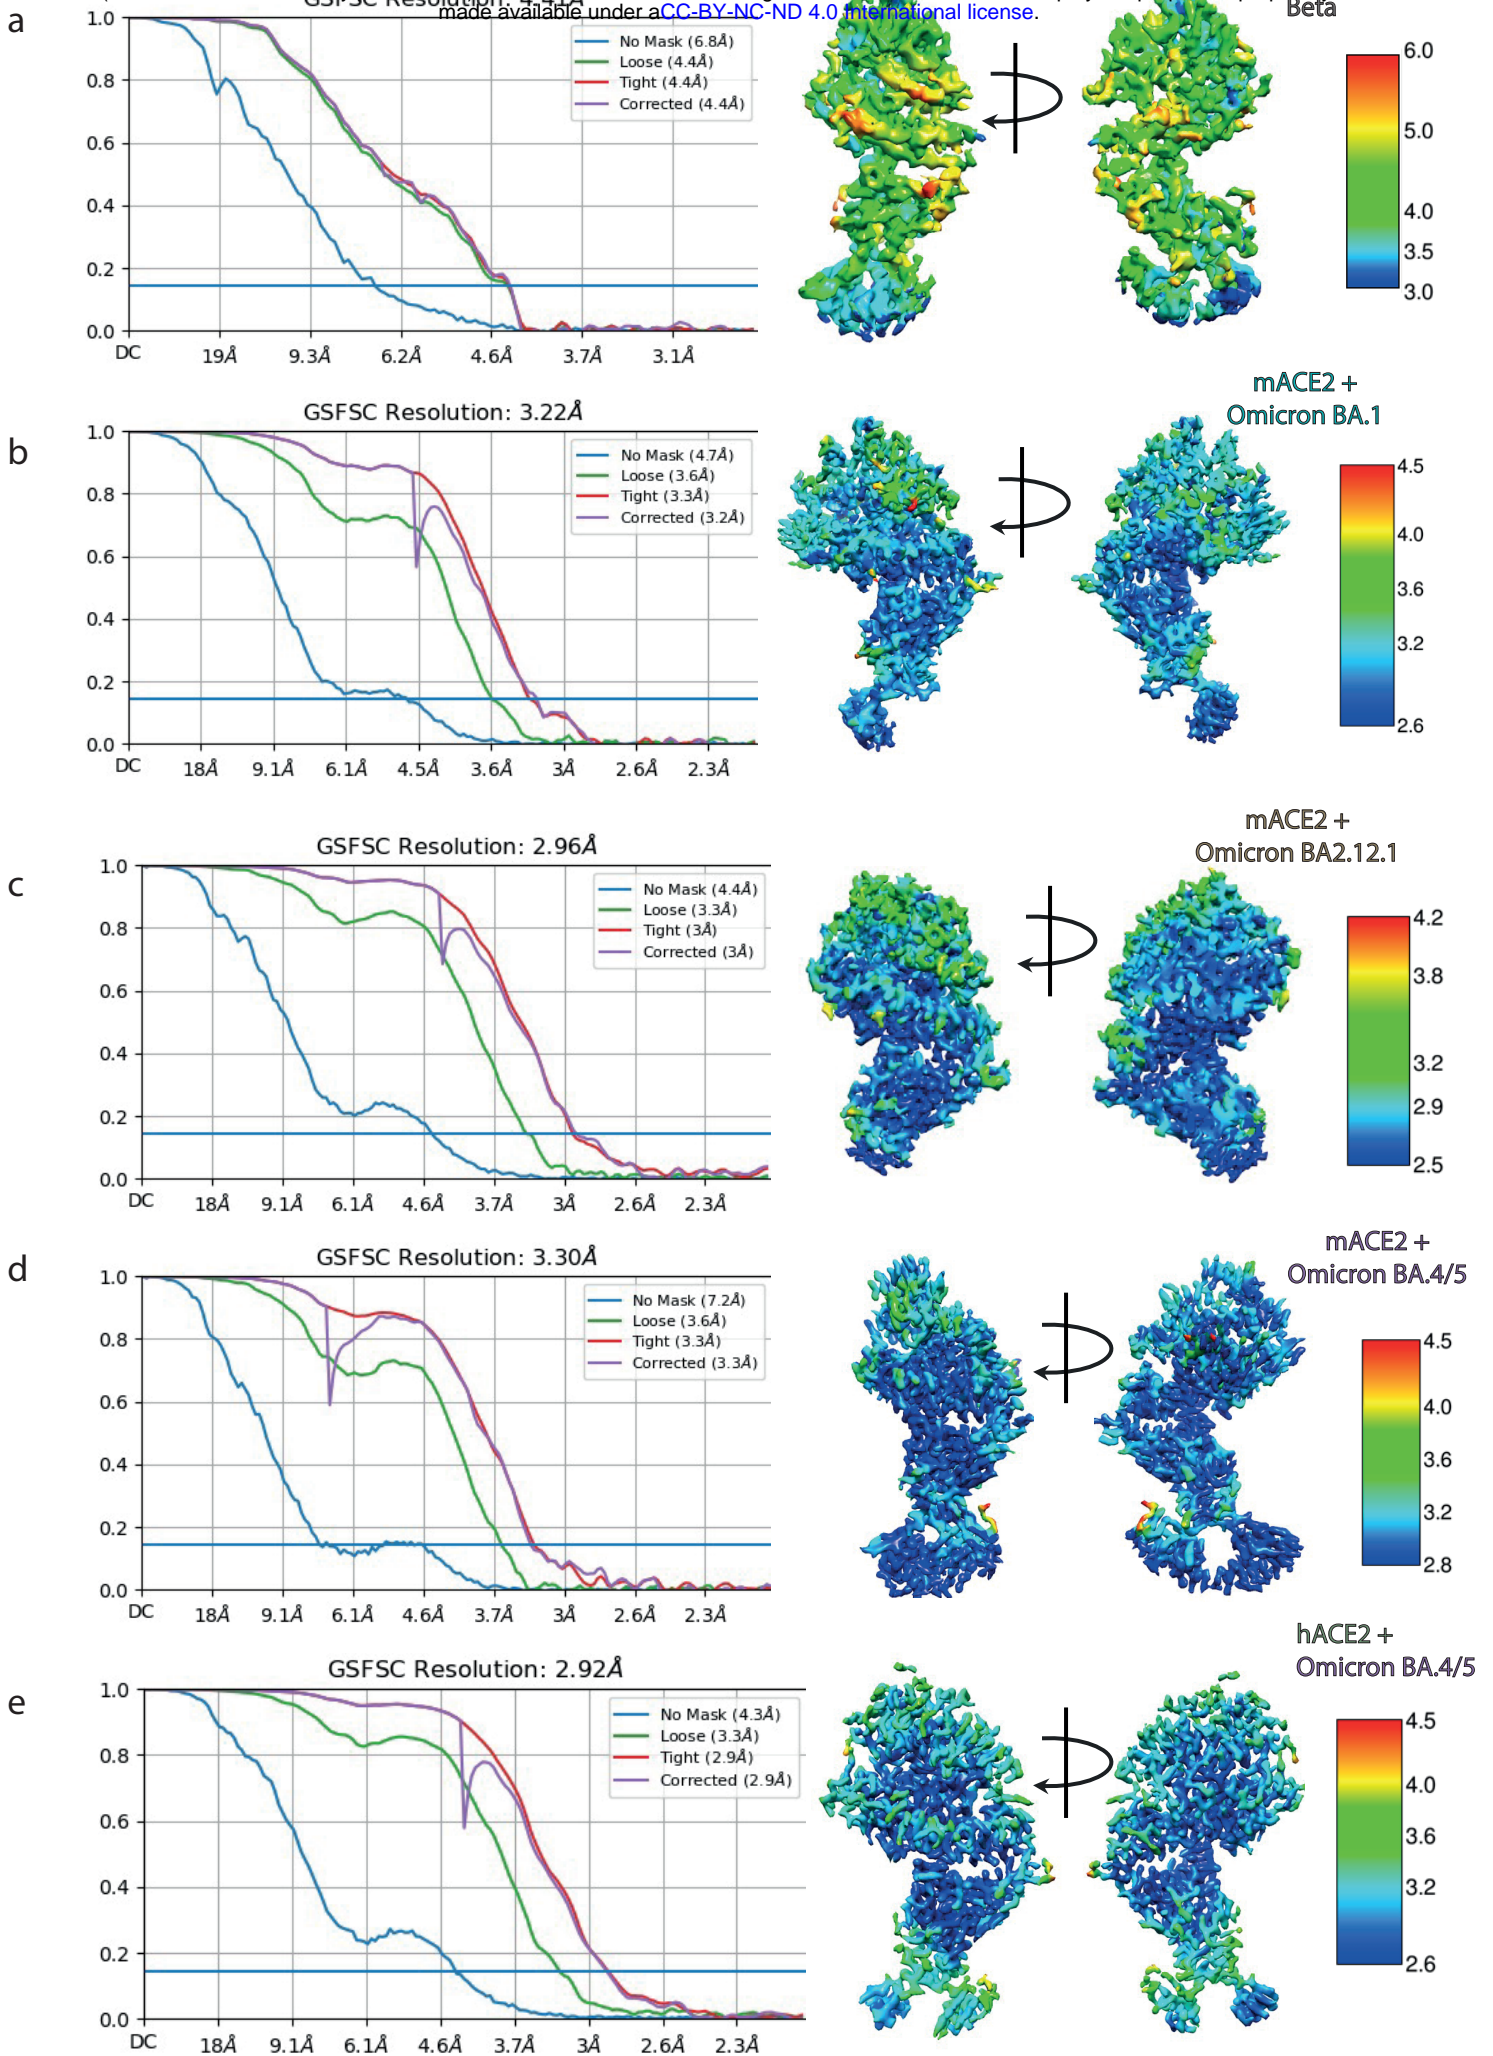

Figure S8

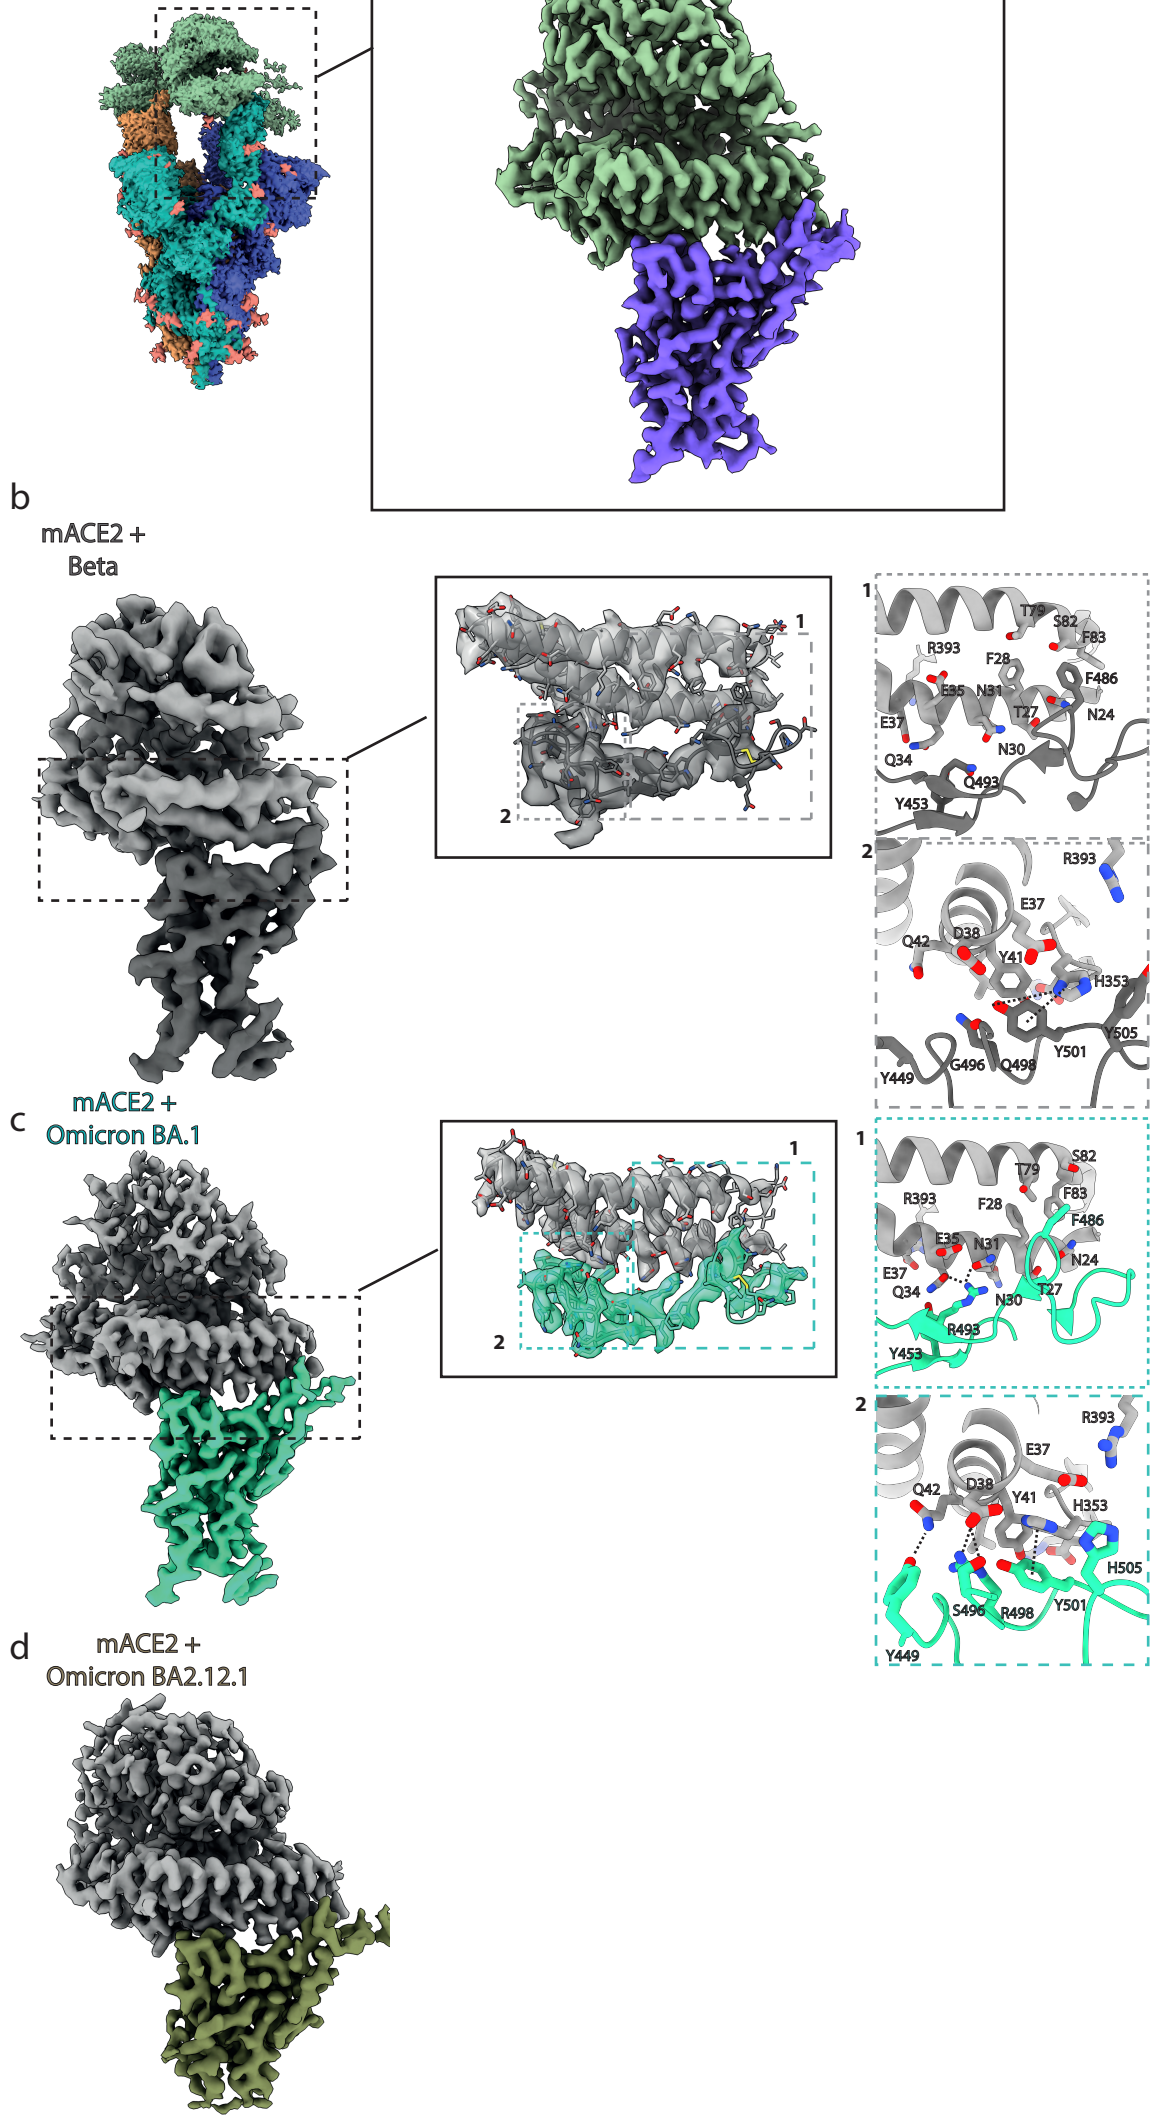

Figure S9

## 318 SUPPLEMENTARY FIGURE LEGENDS

319 **Supplementary information, Fig. S1:** BLI binding assays of mACE2 and hACE2 to various  
320 variants and variants of concern. **a** BLI binding assays of captured dimeric mouse or human  
321 ACE2 versus various concentrations of BA.2. Data curves are colored by concentration and  
322 the black line indicates the 1:1 fit of the data. **b** BLI binding curves of ACE2 at one  
323 concentration of 75 nM against a panel of variants of concerns and single mutants. N501Y  
324 and E484K mutations together are required for high affinity binding to mACE2 on a  
325 prototypic wild-type background.

326

327 **Supplementary information, Fig. S2:** Overview of the domain architecture of selected  
328 variants of concern. Mutations are shown as red lines and labelled for each variant. Specific  
329 domains are highlighted: signal peptide (SP), N- terminal domain (NTD), receptor binding  
330 domain (RBD), S1 and S2 domain.

331

332 **Supplementary information, Fig. S3:** Cryo-EM processing of the mACE2/Beta complex

333 **Supplementary information, Fig. S4:** Cryo-EM processing of the mACE2/BA.1 complex

334 **Supplementary information, Fig. S5:** Cryo-EM processing of the mACE2/BA.2.12.1  
335 complex

336 **Supplementary information, Fig. S6:** Cryo-EM processing of the mACE2/BA.4/5 complex

337 **Supplementary information, Fig. S7:** Cryo-EM processing of the hACE2/BA.4/5 complex

338 **Supplementary information, Fig. S8:** FSC curves indicating resolutions at (FSC 0.143) and  
339 final focused refined maps colored by local resolution.

340

341 **Supplementary information, Fig. S9:** Additional views of ACE2-Spike variant of concern  
342 complexes. **a** Cryo-EM density of the full hACE2/BA.4/5 complexes with the inset showing  
343 the focused refinement of the RBD-ACE2 interface. **b** Focused refinement of the RBD-ACE2  
344 interface of the mACE2/Beta complex showing the cryo-EM density. Inset shows the zoomed  
345 in view of the binding interface. Further zoomed in views of specific interaction sites of patch  
346 1 and patch 2. **c** Focused refinement of the RBD-ACE2 interface of the mACE2/BA.1  
347 complex showing the cryo-EM density. Inset shows the zoomed in view of the binding  
348 interface. Further zoomed in views of specific interaction sites of patch 1 and patch 2. **d**  
349 Focused refinement of the RBD-ACE2 interface of the mACE2/BA.2.12.1 complex showing  
350 the cryo-EM density.
